# Supplementary material
Source: PubMed Central journal article supplement (PMC4121772)
Supplement: 1411082111_pnas.201411082SI.pdf [file 1411082111_pnas.201411082SI.pdf]

# Supporting Information

Labelle et al. 10.1073/pnas.1411082111

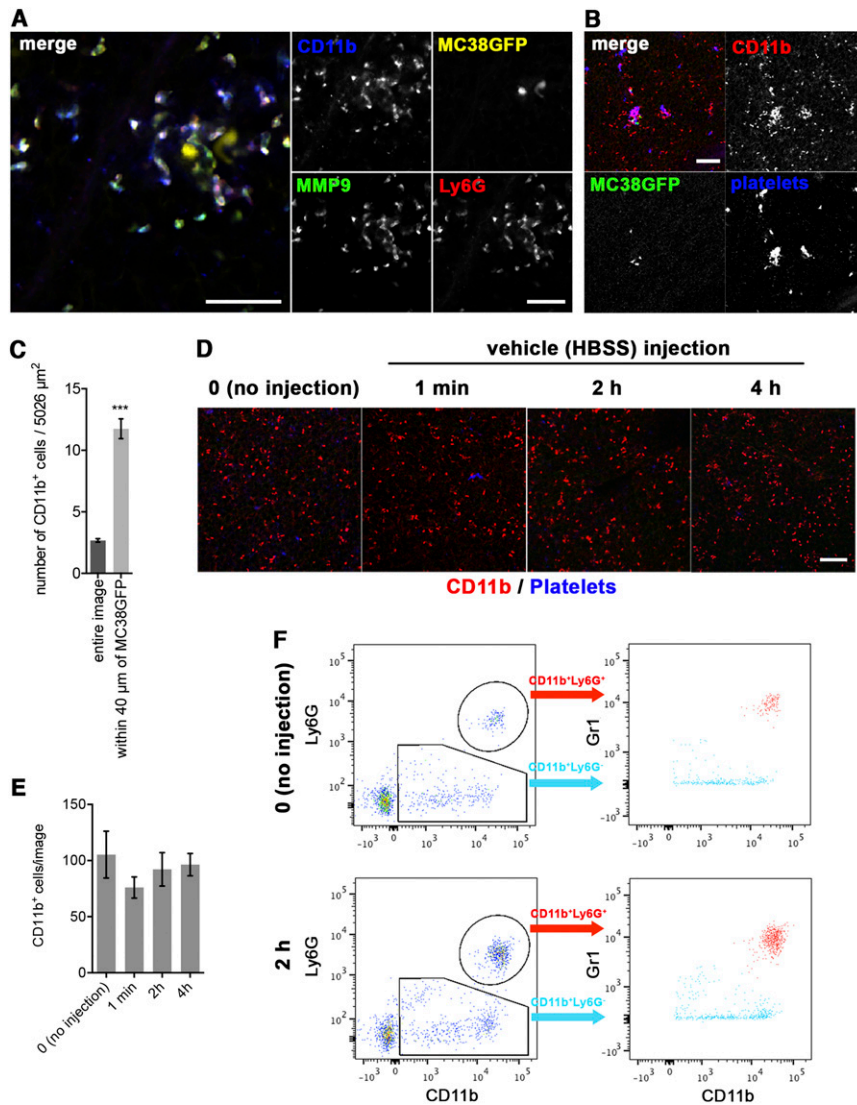

**Fig. S1.** CD11b<sup>+</sup>MMP9<sup>+</sup>Ly6G<sup>+</sup> granulocytes are recruited to platelet–tumor cell aggregates within 2 h of tumor cell entry into the circulation. (A) Immunostaining for CD11b, Ly6G, and MMP9 in mouse lungs 2 h after the injection of  $10^6$  MC38GFP tumor cells. Note that the vast majority of recruited cells coexpress CD11b, Ly6G, and MMP9. (Scale bar: 100  $\mu\text{m}$ .) (B) Immunostaining for CD11b (red), and platelets (GP1b $\beta$ ; blue) in mouse lungs 2 h after the injection of  $10^4$  MC38GFP cells (green). Note the enrichment of CD11b<sup>+</sup> cells in the vicinity of the platelet–tumor cell aggregates. (Scale bar: 100  $\mu\text{m}$ .) (C) Number of CD11b<sup>+</sup> cells localized within a 40- $\mu\text{m}$  radius from the center of MC38GFP cells. The average number of CD11b<sup>+</sup> found in areas of equivalent size (5,026  $\mu\text{m}^2$ ; corresponding to the area of a circle of 40- $\mu\text{m}$  radius) in the same image was determined as control. Bars represent the mean  $\pm$  SEM ( $n = 52$  cells from  $n = 4$  mice). \*\*\* $P < 0.001$  as determined by unpaired two-sided  $t$  test. (D) Immunostaining for CD11b (red), and platelets (GP1b $\beta$ ; blue) in mouse lungs 1 min, 2 h, or 4 h after the injection of vehicle alone (HBSS) or in lungs of control noninjected mice. (Scale bar: 100  $\mu\text{m}$ .) No recruitment of platelets or granulocytes is observed when vehicle alone is injected. (E) Numbers of CD11b<sup>+</sup> cells in the lungs of mice treated as in D. Bars represent the mean  $\pm$  SEM ( $n \geq 12$  images from  $n \geq 3$  mice). (F) Flow cytometry diagrams of viable CD45<sup>+</sup> cells isolated from lungs collected at time 0 (no injection) or 2 h after the injection of  $10^6$  MC38GFP cells. Cells were stained for CD45, CD11b, Ly6G, and Gr1, and with propidium iodide. Note that Ly6G<sup>+</sup> cells also express high levels of CD11b and Gr1.



**Table S1. Secreted chemokines and cytokines**

| Chemokine/cytokine | MC38GFP     | Platelets      | Platelets + MC38GFP |
|--------------------|-------------|----------------|---------------------|
| Pf4                | 32.4 ± 0.6  | 1,169.9 ± 39.8 | 500.0 ± 4.2         |
| CXCL2              | 31.5 ± 1.9  | 778.1 ± 36.5   | 852.5 ± 16.3        |
| sP-selectin        | 68.0 ± 11.0 | 699.2 ± 50.3   | 813.5 ± 29.0        |
| CXCL5              | 10.0 ± 2.6  | 222.4 ± 3.9    | 510.0 ± 1.4         |
| CXCL7              | 7.7 ± 0.4   | 220.9 ± 10.1   | 849.6 ± 26.8        |
| IL1 $\alpha$       | 9.6 ± 1.9   | 74.3 ± 13.7    | 47.0 ± 14.1         |
| IGFBP6             | 1.4 ± 0.6   | 64.1 ± 16.3    | 35.0 ± 2.8          |
| LEPR               | 3.7 ± 1.3   | 61.4 ± 5.9     | 21.0 ± 0.0          |
| CCL20              | 18.3 ± 3.9  | 58.6 ± 2.0     | 67.5 ± 33.2         |
| Leptin             | 3.7 ± 0.0   | 58.1 ± 11.7    | 28.0 ± 2.8          |
| IL13               | 5.9 ± 0.6   | 57.2 ± 14.4    | 28.0 ± 0.0          |
| sIL3R $\beta$      | 11.9 ± 1.3  | 56.3 ± 7.8     | 75.0 ± 60.8         |
| IL1 $\beta$        | 7.8 ± 0.6   | 48.9 ± 1.3     | 6.0 ± 1.4           |
| CCL2               | 39.7 ± 0.6  | 48.9 ± 2.6     | 59.5 ± 2.1          |
| IL2                | 15.5 ± 2.6  | 46.2 ± 2.6     | 26.0 ± 0.0          |
| VEGF               | 3.7 ± 1.3   | 43.8 ± 22.8    | 16.5 ± 2.1          |
| MMP3               | 38.2 ± 0.8  | 41.5 ± 1.7     | 42.7 ± 1.4          |
| IGF1               | 17.2 ± 1.1  | 40.6 ± 3.8     | 50.7 ± 0.9          |
| sL-selectin        | 25.1 ± 0.6  | 39.7 ± 5.2     | 36.5 ± 0.7          |
| IL9                | 40.6 ± 0.6  | 39.7 ± 6.5     | 42.5 ± 3.5          |
| CCL5               | 5.5 ± 0.0   | 37.4 ± 12.4    | 12.0 ± 2.8          |
| XCL1               | 24.7 ± 6.5  | 35.5 ± 2.0     | 27.5 ± 2.1          |
| IL3                | 3.2 ± 0.6   | 34.6 ± 22.8    | 13.5 ± 3.5          |
| VCAM1              | 9.1 ± 1.3   | 34.2 ± 9.1     | 32.0 ± 1.4          |
| CXCL12             | 28.3 ± 0.0  | 34.2 ± 0.0     | 31.0 ± 1.4          |
| CXCL1              | 6.4 ± 0.0   | 33.7 ± 5.9     | 6.5 ± 2.1           |
| IGFBP3             | 9.6 ± 1.9   | 31.4 ± 11.7    | 30.5 ± 9.2          |
| CCL19              | 4.1 ± 0.6   | 30.5 ± 1.3     | 13.5 ± 0.7          |
| CCL27              | 17.4 ± 0.0  | 29.1 ± 0.7     | 30.5 ± 4.9          |
| TIMP2              | 26.3 ± 3.4  | 28.1 ± 0.4     | 30.1 ± 2.7          |
| IGFBP5             | 3.2 ± 0.6   | 27.7 ± 6.5     | 22.0 ± 1.4          |
| CCL17              | 23.3 ± 0.6  | 27.7 ± 0.0     | 27.5 ± 0.7          |
| IFN $\gamma$       | 28.3 ± 2.6  | 27.7 ± 0.0     | 32.5 ± 2.1          |
| sE-selectin        | 12.7 ± 0.8  | 27.5 ± 8.8     | 26.6 ± 5.9          |
| CXCL16             | 10.0 ± 1.3  | 26.3 ± 0.7     | 40.5 ± 4.9          |
| CXCL10             | 10.5 ± 0.6  | 22.6 ± 8.5     | 15.0 ± 2.8          |
| IL12 p70           | 15.5 ± 1.3  | 21.2 ± 2.6     | 25.5 ± 3.5          |
| IL10               | 14.2 ± 0.6  | 20.3 ± 9.1     | 18.0 ± 2.8          |
| CCL24              | 16.0 ± 1.9  | 20.3 ± 0.0     | 25.5 ± 3.5          |
| SCF                | 5.9 ± 0.6   | 20.3 ± 3.9     | 31.0 ± 5.7          |
| TNF $\alpha$       | 19.6 ± 4.5  | 19.8 ± 2.0     | 27.5 ± 0.7          |
| CCL3               | 3.2 ± 0.6   | 19.4 ± 2.6     | 17.5 ± 0.7          |
| 1L12p40/p70        | 15.1 ± 0.6  | 19.4 ± 10.4    | 20.0 ± 1.4          |
| Dtk                | 21.5 ± 2.6  | 19.3 ± 8.0     | 16.0 ± 4.5          |
| CCL9               | 4.1 ± 0.6   | 18.5 ± 3.9     | 19.5 ± 0.7          |
| VEGFR2             | 10.9 ± 6.4  | 18.1 ± 1.3     | 16.7 ± 3.6          |
| IL15               | 20.2 ± 1.5  | 17.5 ± 0.4     | 19.9 ± 0.9          |
| TPO                | 4.6 ± 1.3   | 17.1 ± 2.0     | 8.0 ± 0.0           |
| sTNFRII            | 15.1 ± 0.6  | 16.6 ± 5.2     | 34.0 ± 1.4          |
| M-CSF              | 7.8 ± 0.6   | 16.2 ± 0.7     | 19.5 ± 0.7          |
| CCL11              | 2.3 ± 0.6   | 16.2 ± 2.0     | 25.5 ± 40.3         |
| CXCL13             | 7.8 ± 0.6   | 15.7 ± 1.3     | 11.0 ± 2.8          |
| GITR               | 10.3 ± 1.1  | 14.5 ± 2.1     | 15.1 ± 1.4          |
| AXL                | 4.6 ± 1.3   | 13.8 ± 1.3     | 8.5 ± 0.7           |
| FasL               | 10.0 ± 2.6  | 13.4 ± 2.0     | 12.0 ± 1.4          |
| CCL25              | 8.2 ± 1.3   | 12.5 ± 0.7     | 17.5 ± 2.1          |
| CCL1               | 3.7 ± 0.0   | 12.0 ± 0.0     | 13.5 ± 2.1          |
| IL4                | 13.2 ± 0.6  | 12.0 ± 1.3     | 18.0 ± 1.4          |
| CD30T              | 5.5 ± 0.0   | 12.0 ± 2.6     | 6.5 ± 0.7           |
| ITAC               | 12.7 ± 2.3  | 11.8 ± 1.7     | 13.2 ± 3.2          |
| CD40               | 3.2 ± 0.6   | 11.5 ± 0.7     | 8.5 ± 3.5           |
| IL17BR             | 14.1 ± 1.1  | 11.0 ± 0.4     | 16.4 ± 0.5          |
| TIMP1              | 10.5 ± 0.6  | 10.6 ± 0.7     | 21.5 ± 0.7          |
